# Supplementary material for: A smart tumor microenvironment responsive nanoplatform based on upconversion nanoparticles for efficient multimodal imaging guided therapy
Source: Royal Society of Chemistry journal article supplement (doi:10.1039/c8bm01243a), 2018-11-27
Supplement: c8bm01243a1.pdf [file c8bm01243a1.pdf]

## Electronic Supplementary Information

# A smart tumor microenvironment responsive nanoplatform based on upconversion nanoparticles for efficient multimodal imaging guided therapy

Shikai Liu,<sup>‡</sup> Wenting Li,<sup>‡</sup> Shili Gai,<sup>\*</sup> Guixin Yang, Chongna Zhong, Yunlu Dai, Fei He<sup>\*</sup>, Piaoping Yang<sup>\*</sup> and Yung Doug SUH<sup>\*bc</sup>

*<sup>a</sup> Key Laboratory of Superlight Materials and Surface Technology, Ministry of Education, College of Material Sciences and Chemical Engineering, Harbin Engineering University, Harbin, 150001, P. R. China.*

*<sup>b</sup> Research Center for Bio Platform Technology, Korea Research Institute of Chemical Technology (KRICT), Yuseong P.O. Box 107, DaeJeon 305-600, Korea.*

*<sup>c</sup> School of Chemical Engineering, SungKyunKwan University (SKKU), Suwon 440-746, Korea.*

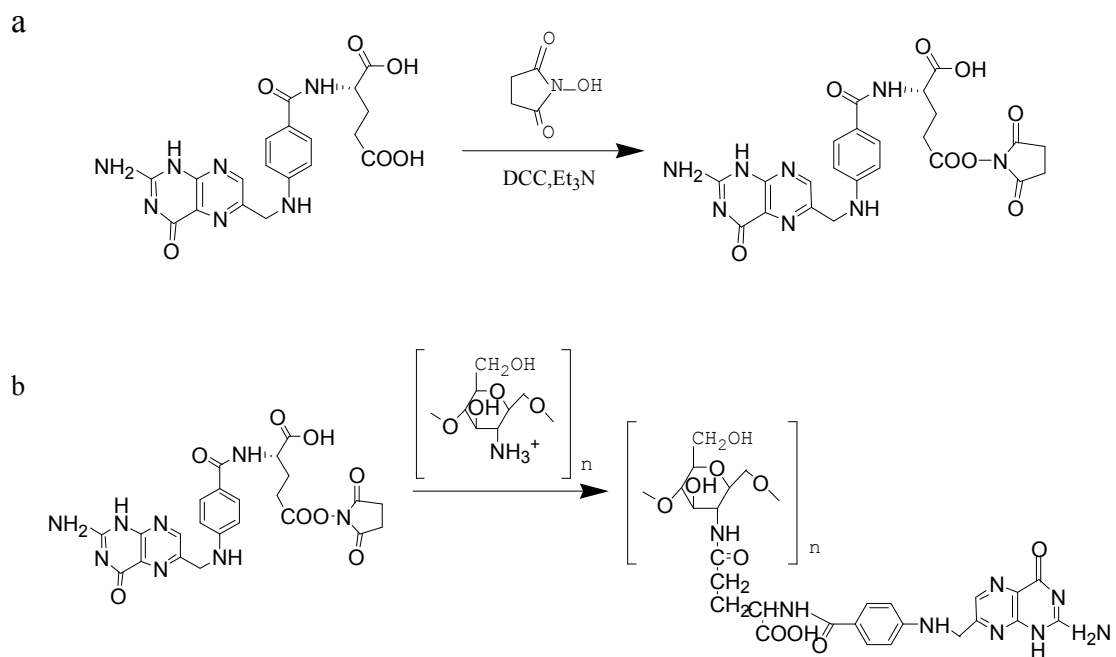

**Scheme S1** Schematic illustration for the synthesis of folate chitosan. (a) The reaction between folic acid and NHS to form NHS-ester of folic acid. (b) The synthesis of folate chitosan from NHS-ester of folic acid and chitosan.

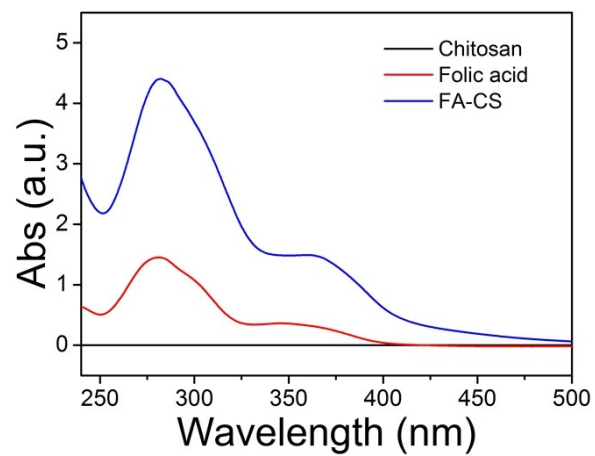

**Fig. S1** The UV-vis absorption spectra of folic acid, chitosan and folate chitosan, respectively.

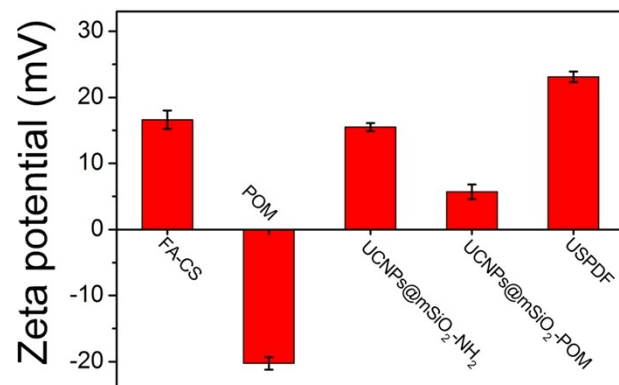

**Fig. S2** The Zeta potentials of FA-CS, POM cluster, UCNPs@mSiO<sub>2</sub>-NH<sub>2</sub>, UCNPs@mSiO<sub>2</sub>-POM, USPDF.

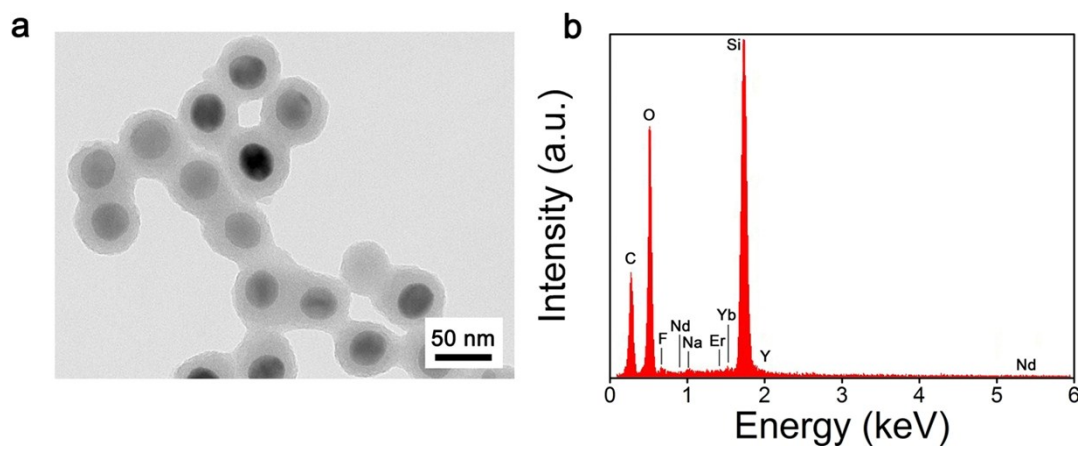

**Fig. S3** The TEM image and EDS spectrum of UCNPs@mSiO<sub>2</sub>.

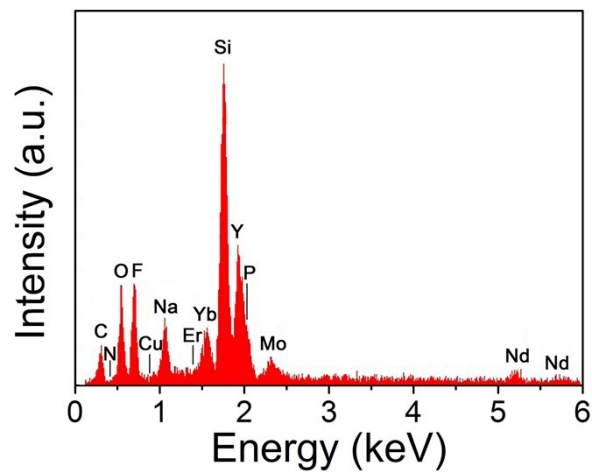

**Fig. S4** The EDS spectrum of USPDF.

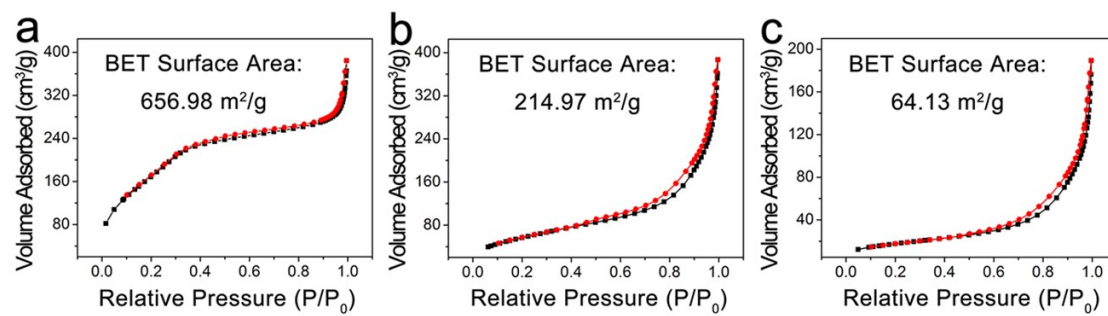

**Fig. S5**  $N_2$  adsorption/desorption isotherms of (a) UCNPs@mSiO<sub>2</sub> (b) UCNPs@mSiO<sub>2</sub>-POM and (c) UCNPs@mSiO<sub>2</sub>-POM-DOX.

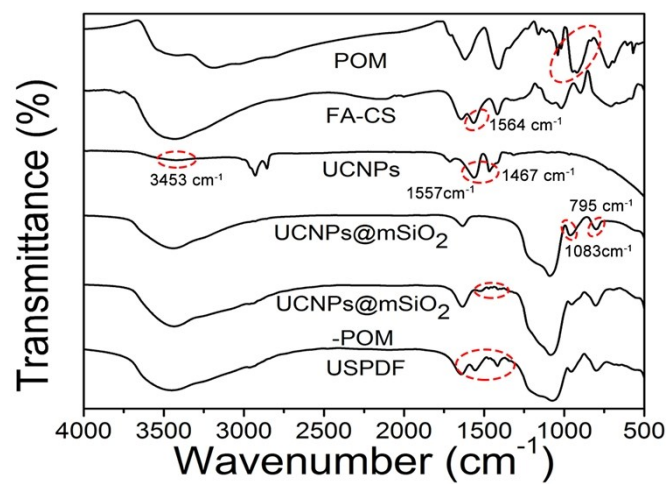

**Fig. S6** FT-IR spectra of POM, UCNPs, UCNPs@mSiO<sub>2</sub>, UCNPs@mSiO<sub>2</sub>-POM, FA-CS, and USPDF.



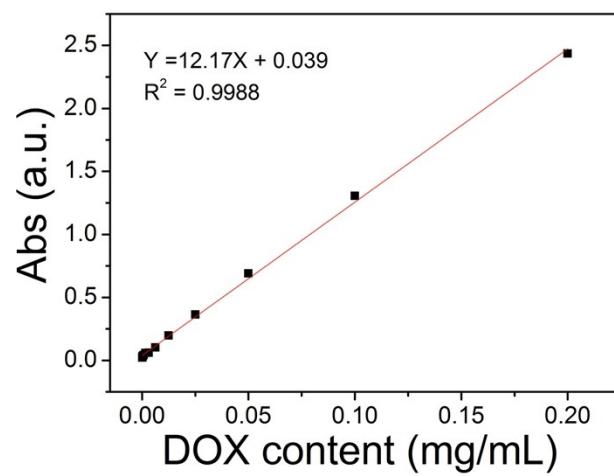

**Fig. S7** The standard curve of pure DOX detected at 490 nm.

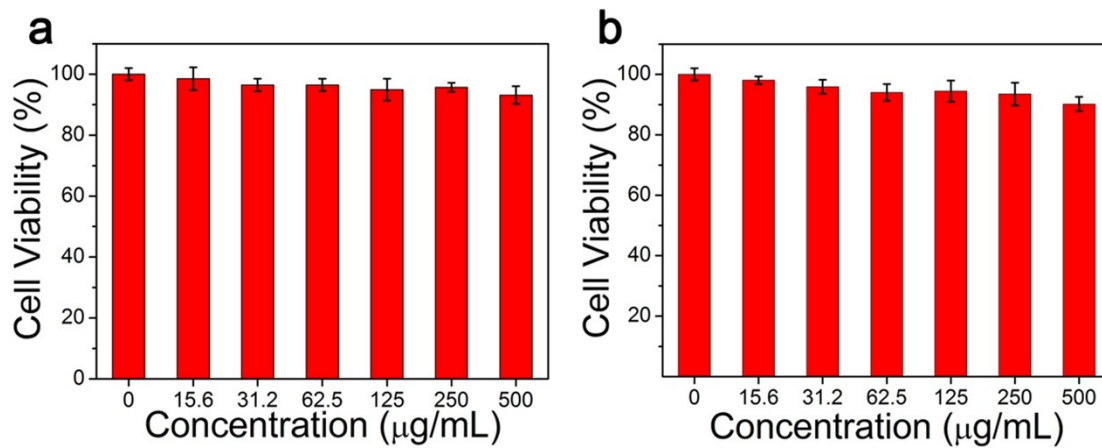

**Fig. S8** The cell viability of L929 cell line after incubating with different concentration of POM (a) and USPDF (b) for 24 h.

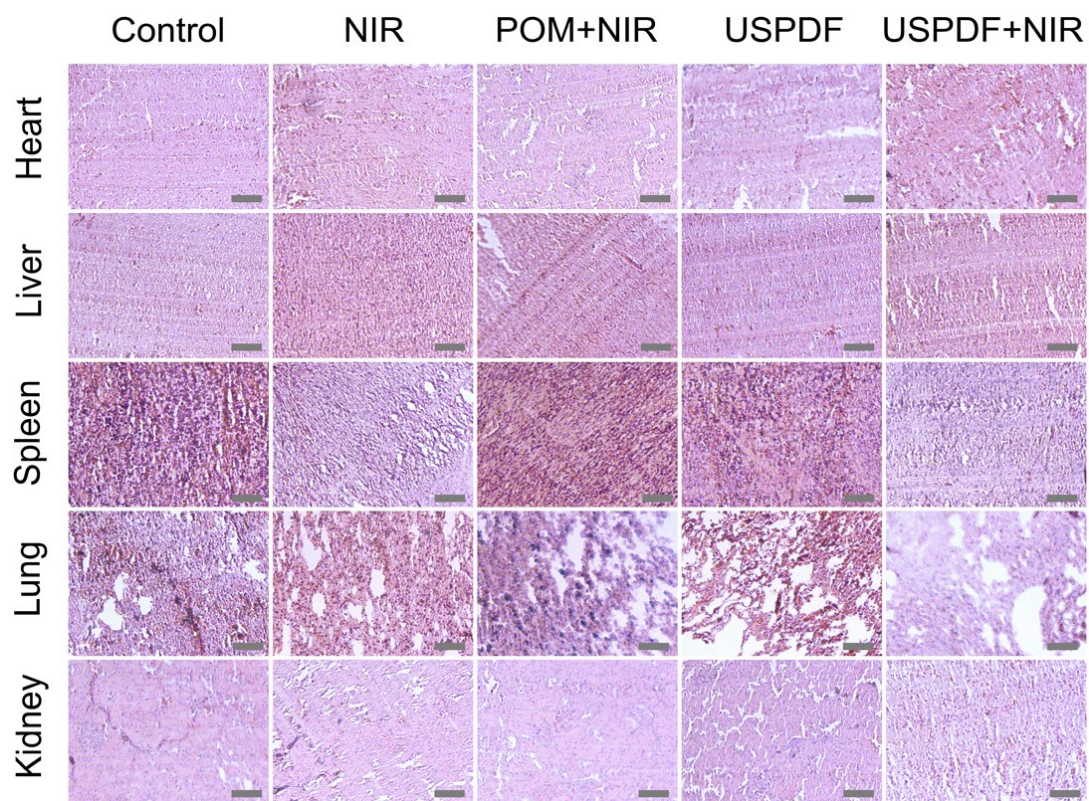

**Fig. S9** H&E stained images of liver, lung, kidney, heart and spleen obtained from different groups after 14 days treatment (Scale bar: 30  $\mu$ m).
